# Supplementary material for: Biodegradability and cytotoxicity of choline soaps on human cell lines: effects of chain length and the cation
Source: Royal Society of Chemistry journal article supplement (doi:10.1039/c3ra42812e), 2013-01-01

## Electronic Supplementary Information

### Biodegradability and cytotoxicity of choline soaps on human cell lines: effects of chain length and cation

*Regina Klein,<sup>a</sup> Eva Müller,<sup>a</sup> Birgit Kraus,<sup>\*b</sup> Gabi Brunner,<sup>b</sup> Boris Estrine,<sup>c</sup>  
Didier Touraud,<sup>a</sup> Joerg Heilmann,<sup>b</sup> Matthias Kellermeier,<sup>d</sup> and Werner Kunz<sup>\*a</sup>*

<sup>a</sup> Institute of Physical and Theoretical Chemistry, University of Regensburg,  
Universitätsstrasse 31, D-93040 Regensburg, Germany

<sup>b</sup> Institute of Pharmaceutical Biology, University of Regensburg,  
Universitätsstrasse 31, D-93040 Regensburg, Germany

<sup>c</sup> ARD (Agroindustrie Recherche et Développement), Route de Bazancourt,  
F-51110 Pomacle, France

<sup>d</sup> Physical Chemistry, University of Konstanz, Universitätsstrasse 10,  
D-78457 Konstanz, Germany

## Section S1: HeLa dose-response curves of ChC*m* surfactants for *m* = 8-16

Each plot contains three to six dose-response curves, which were established over several weeks. Each data point represents the average of three parallel measurements.

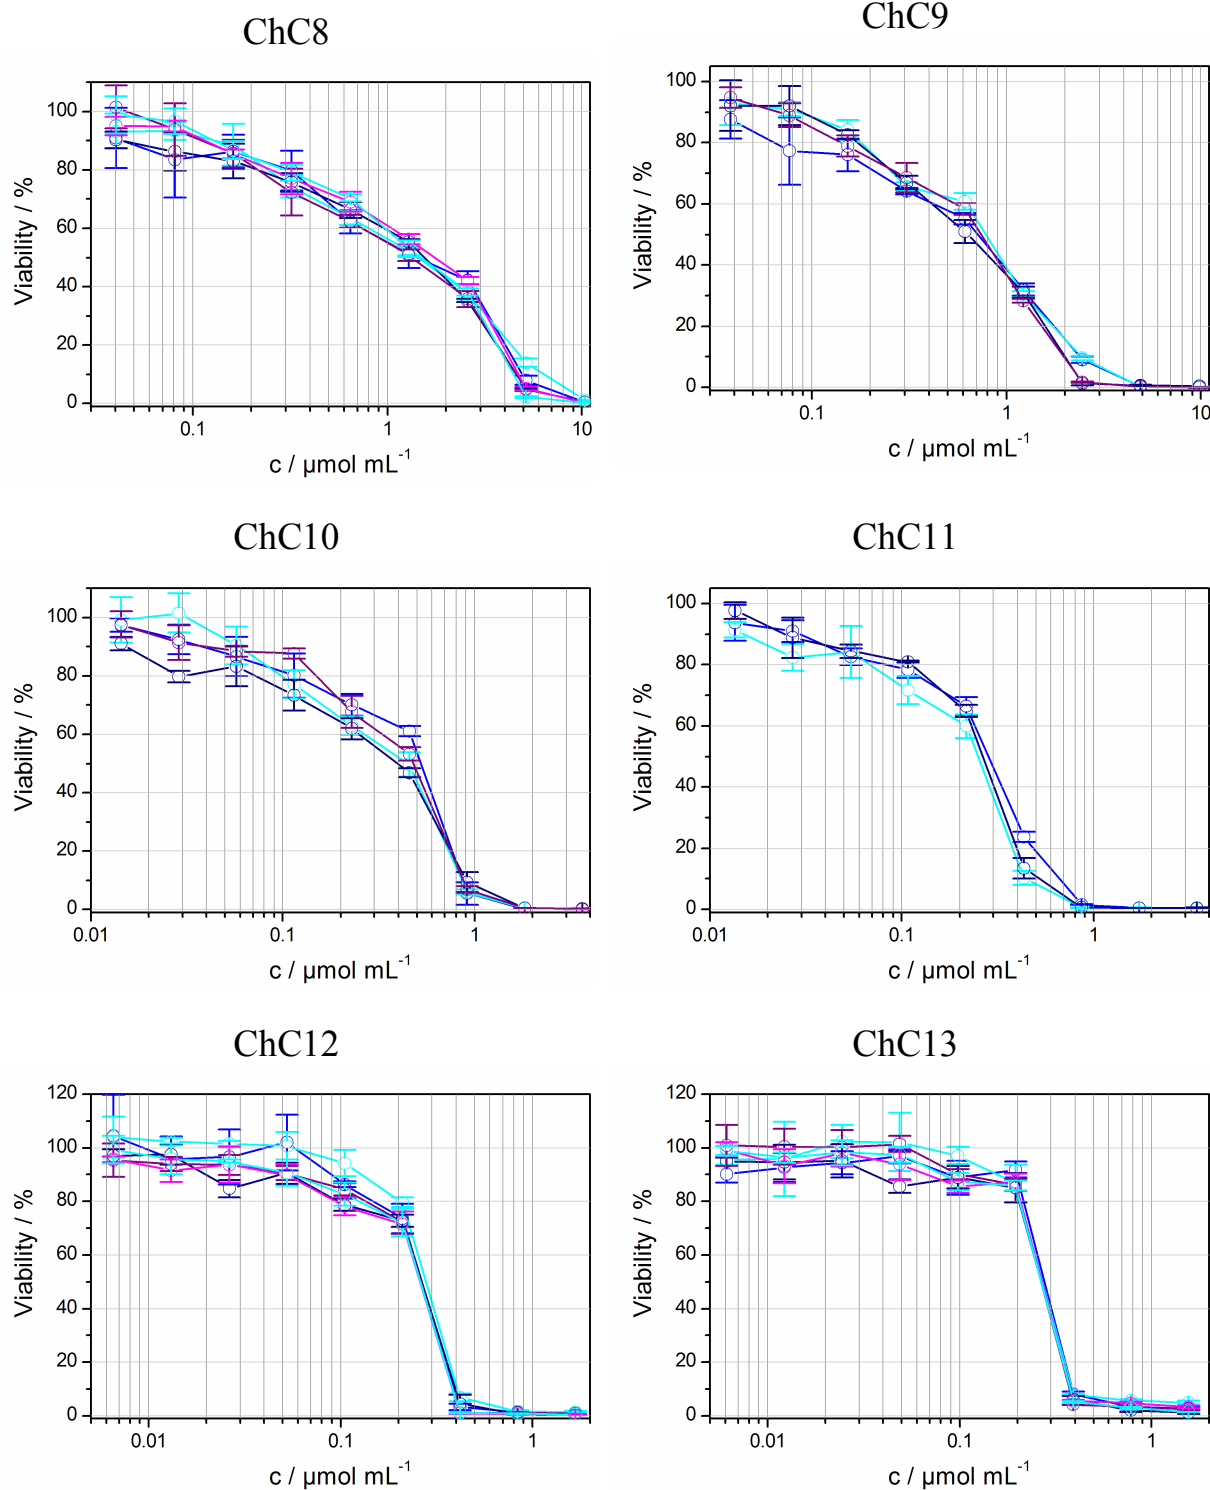

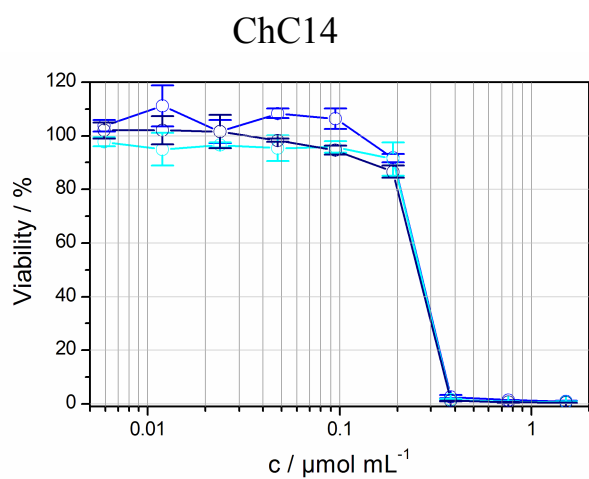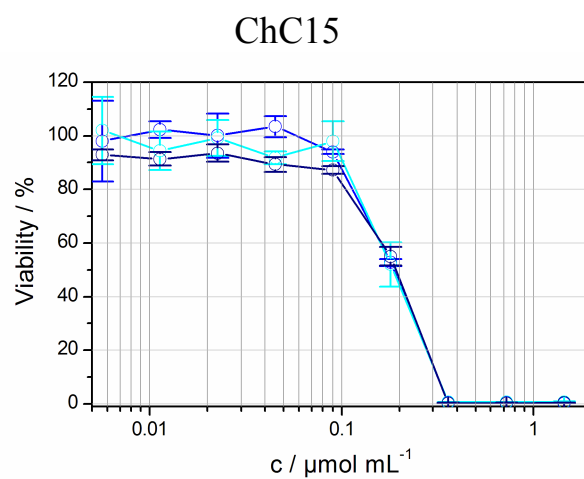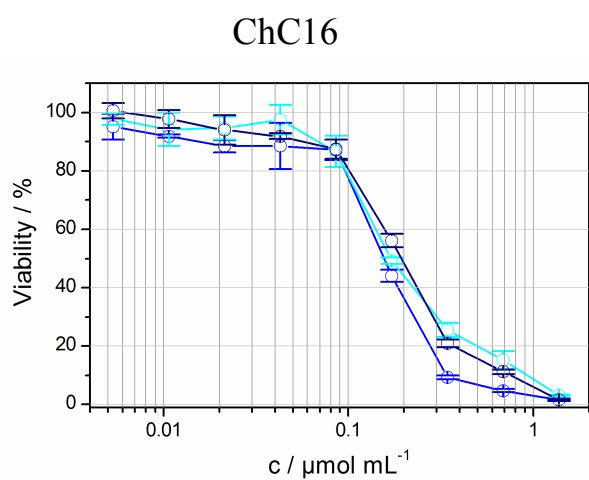

## Section S2: SK-Mel-28 dose-response curves of ChC*m* surfactants for *m* = 8-16

Each plot contains three to six dose-response curves, which were established over several weeks. Each data point represents the average of three parallel measurements.

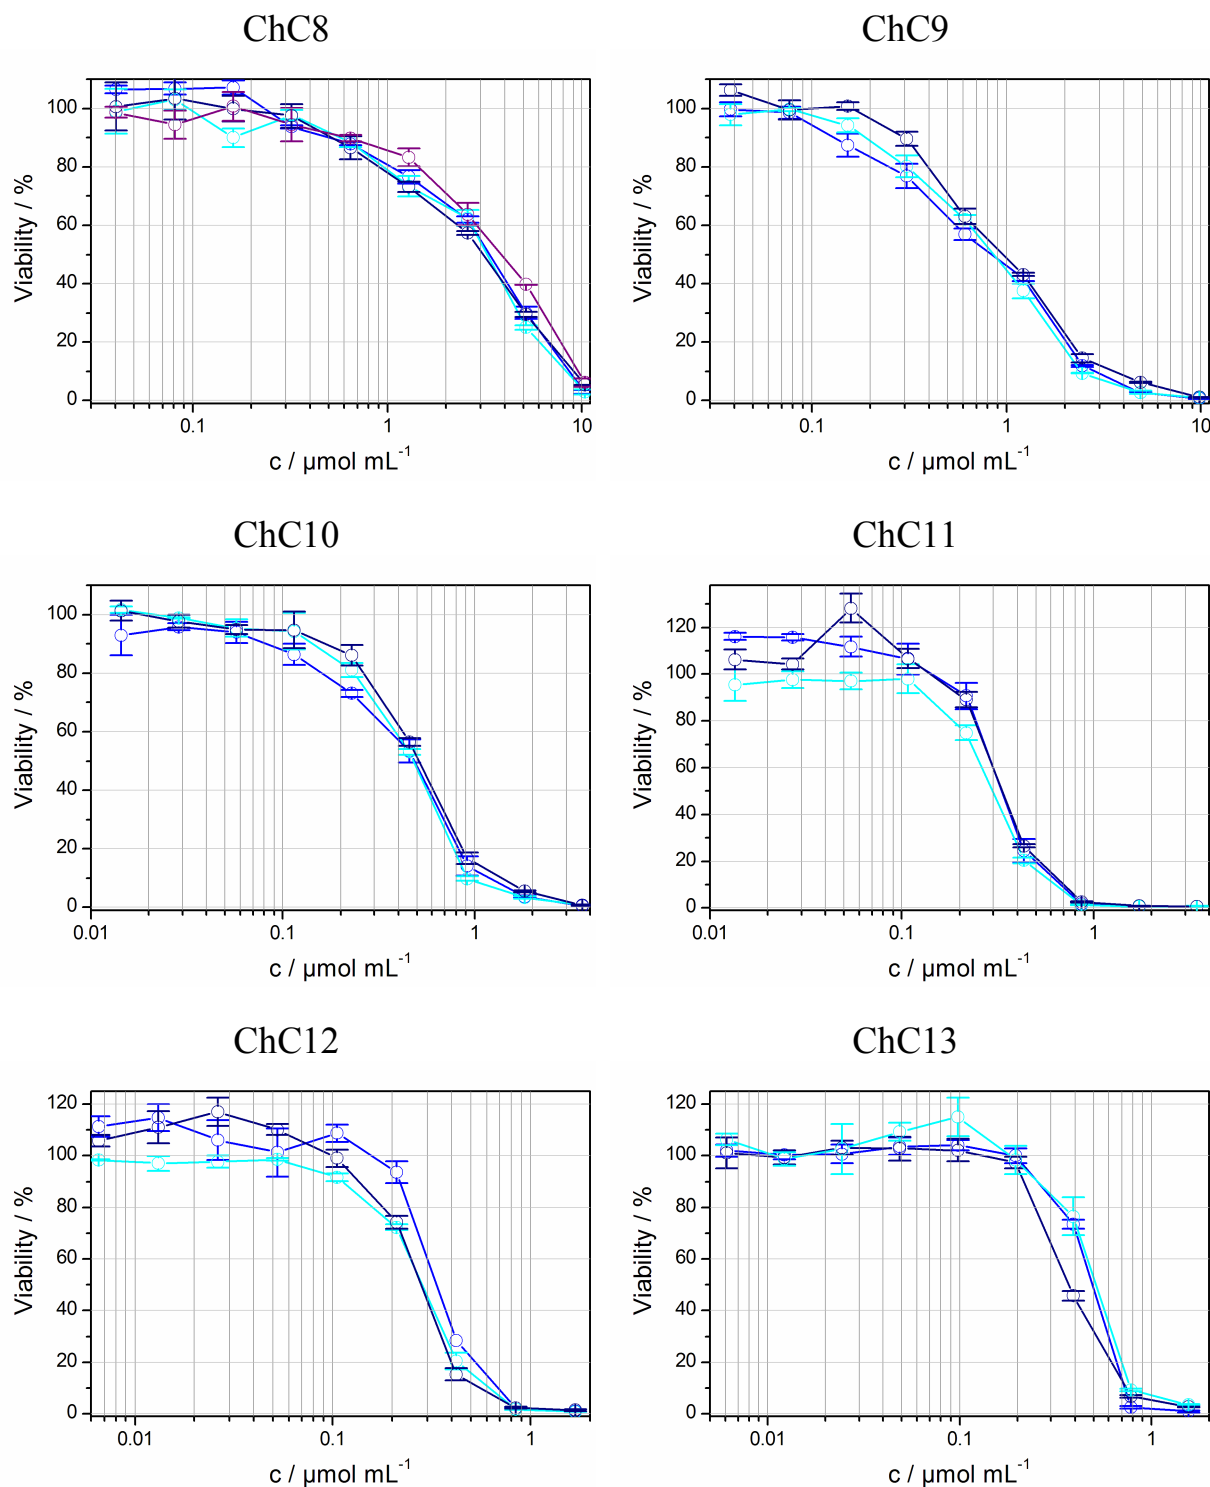

ChC14

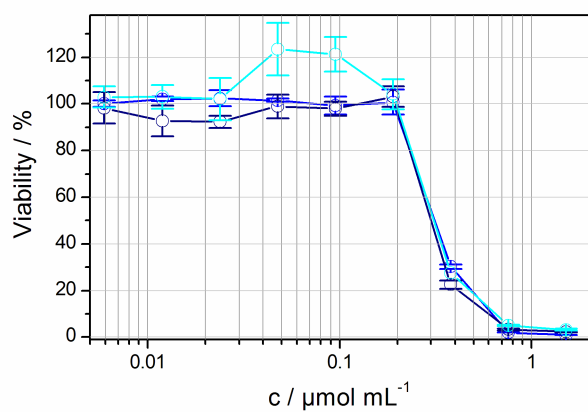

ChC15

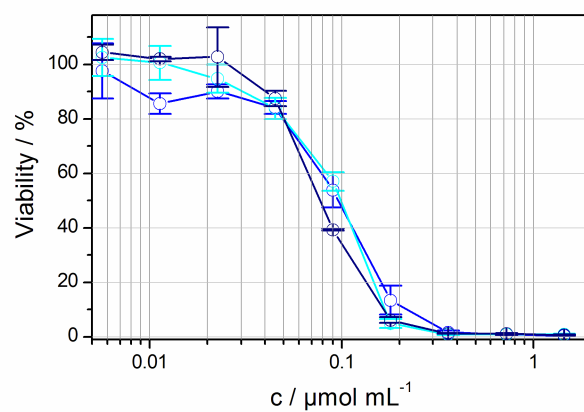

ChC16

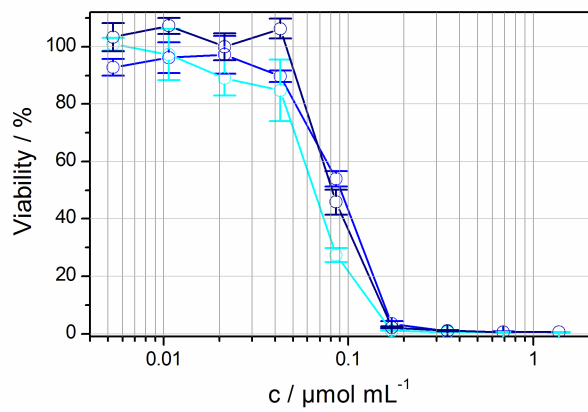

### Section S3: Time-dependent phase contrast and fluorescence images of HeLa cells treated with pyrene-substituted choline and sodium dodecanoate soaps

HeLa cells were incubated with 2:1 molar mixtures of ChC12/ChPC12 (left) and NaC12/NaPC12 (right) at concentrations slightly below the respective  $IC_{50}$  values ( $81 \mu\text{M}$  for ChC12/ChPC12 and  $102 \mu\text{M}$  for NaC12/NaPC12). Images were recorded immediately after addition of surfactants (0 h) and subsequently every 10 min in the same well over a total period of 60 min (scale bars:  $20 \mu\text{m}$ ).

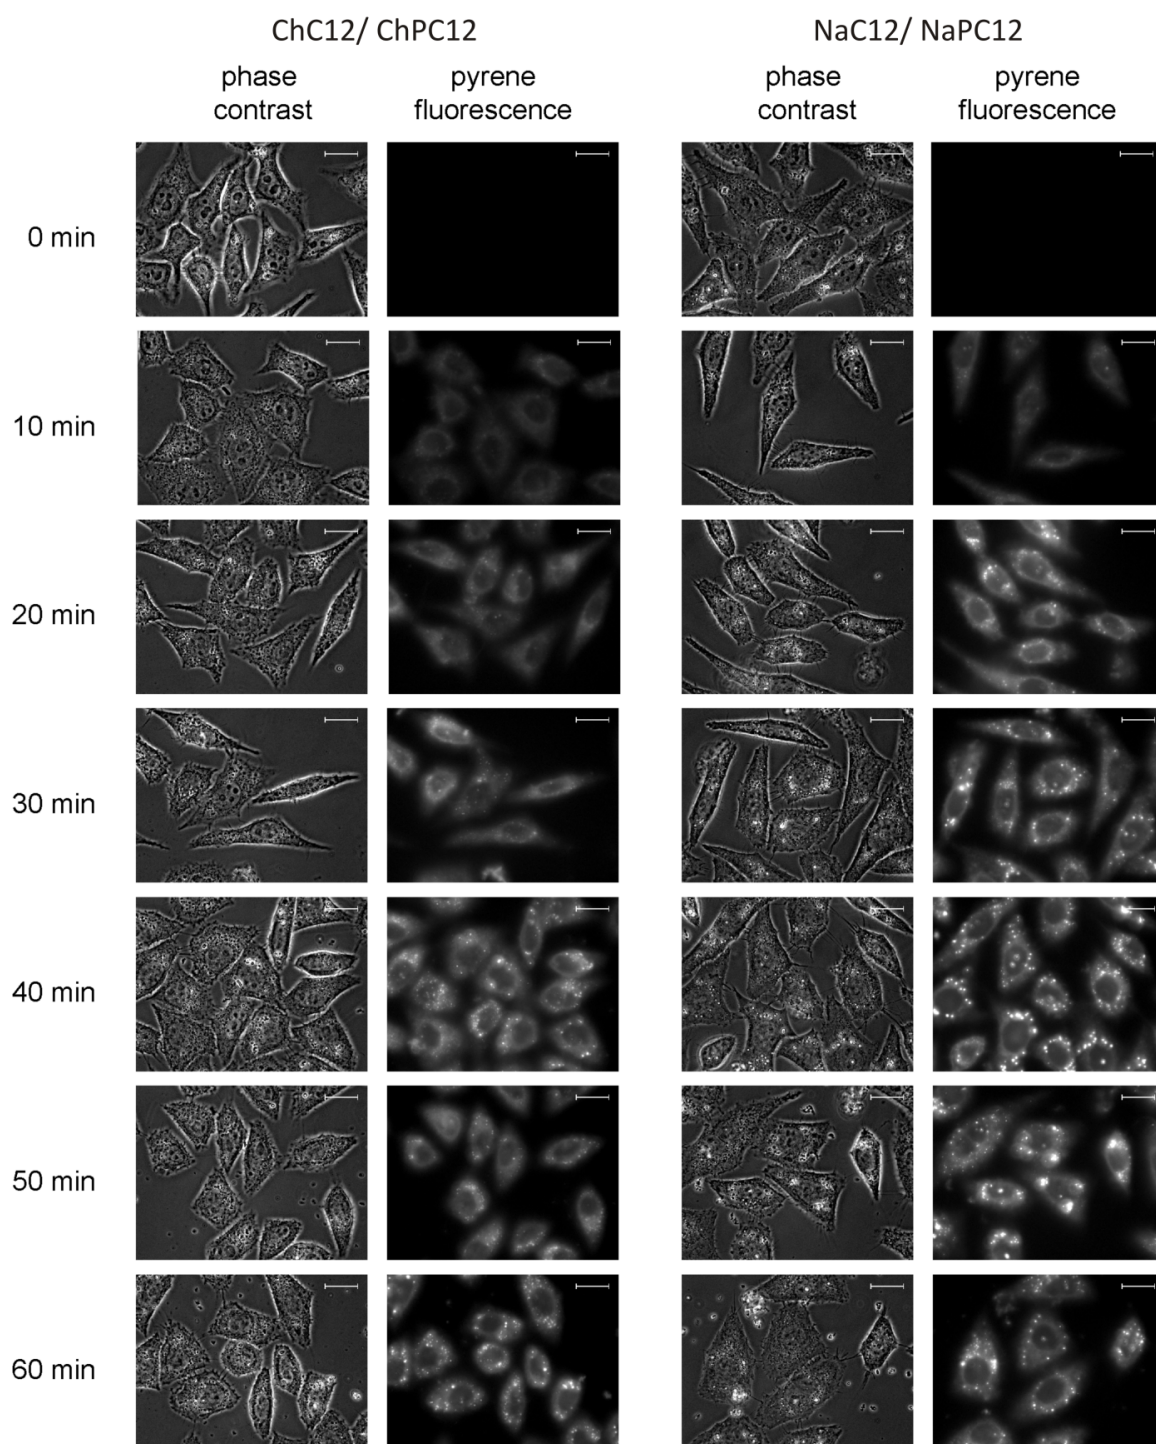

Supplement: c3ra42812e.pdf [file c3ra42812e.pdf]
